# Supplementary material for: EGF receptor (EGFR) inhibition promotes a slow-twitch oxidative, over a fast-twitch, muscle phenotype
Source: PubMed Central journal article supplement (PMC6592914; doi:10.1038/s41598-019-45567-4), 2019-06-25

EGF receptor (EGFR) inhibition promotes a slow-twitch oxidative, over a fast-twitch, muscle phenotype

Margherita Ciano, Giada Mantellato, Martin Connolly, Mark Paul-Clark, Saffron Willis-Owen, Miriam F Moffatt, William O.C.M. Cookson, Jane A Mitchell, Michael I Polkey, Simon M. Hughes, Paul R. Kemp, S. Amanda Natanek

Corresponding author:

Dr Samantha Amanda Natanek, Molecular Medicine, NHLI, SAF Building, Imperial College London,  
London, SW7 2AZ, UK. +44 (0)20 75  
94 2831. a.natanek@imperial.ac.uk

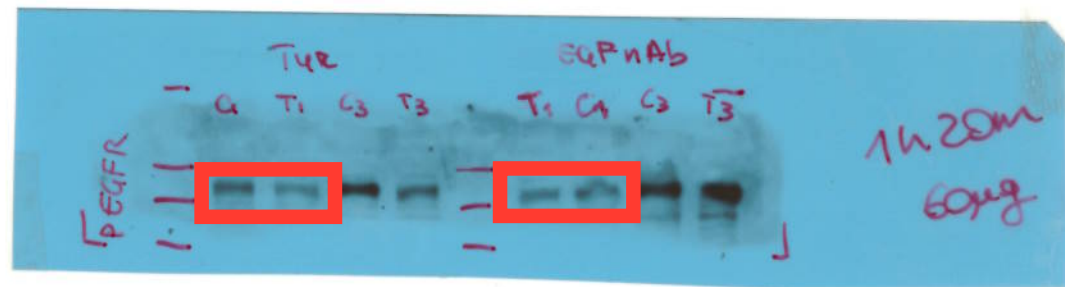

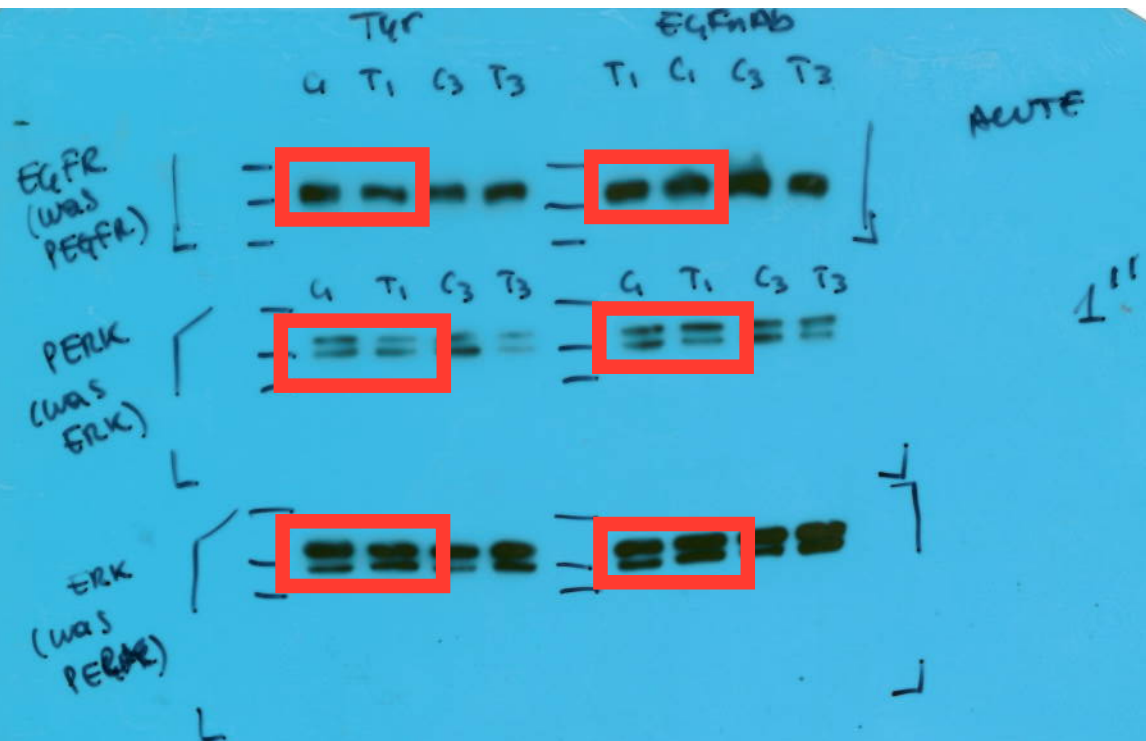

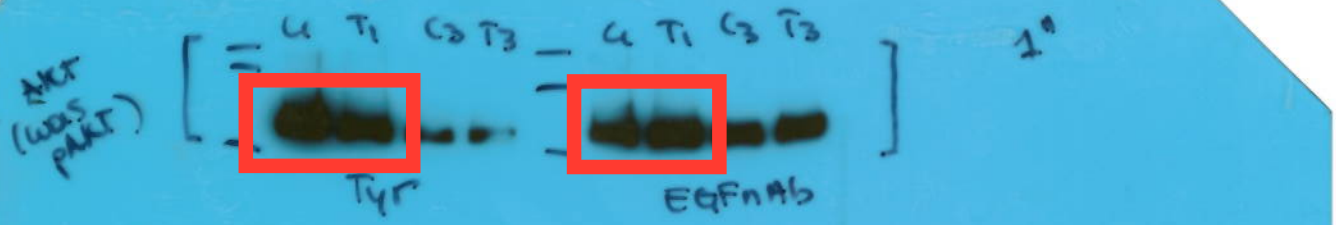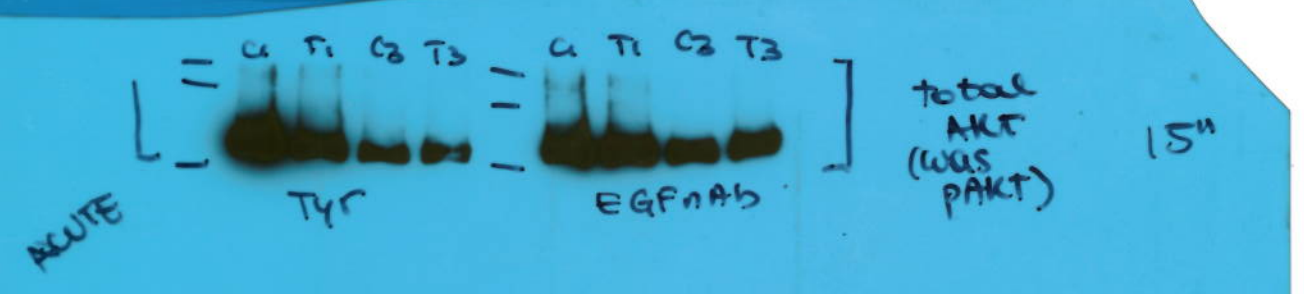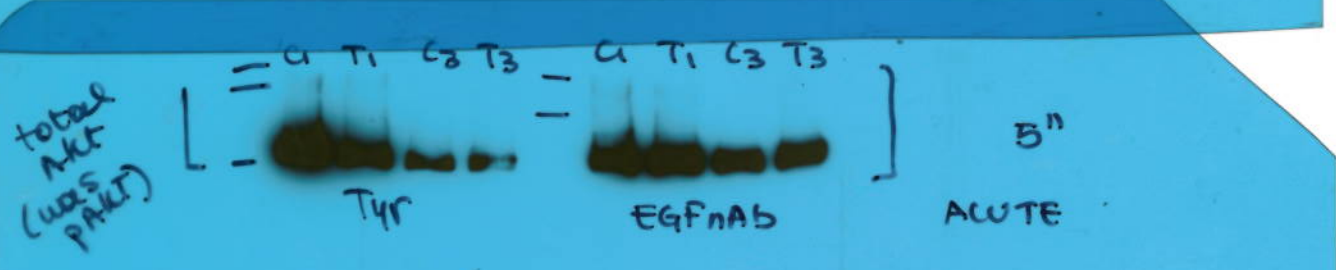

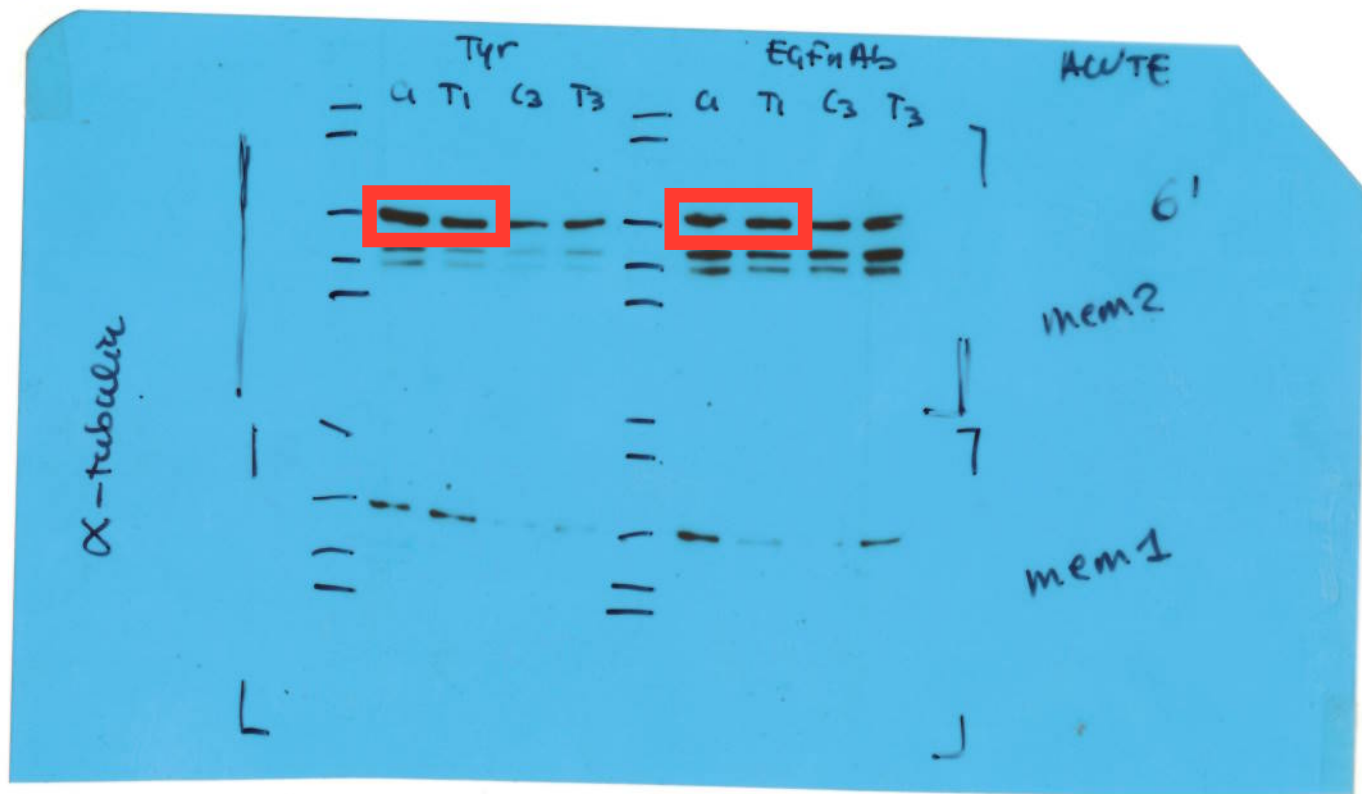

chronic  
siRNA

1h 30m

PKC $\alpha$ PR  
(was  
ECUPR)

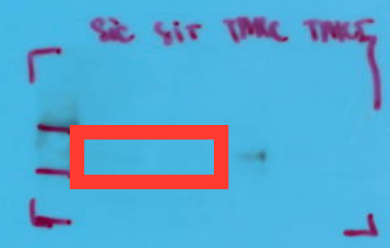

PAMPK  
(was PAKT)

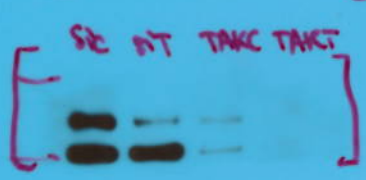

siC siT TACK TACK2

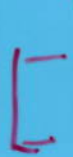

PAKT  
(PAMPK)

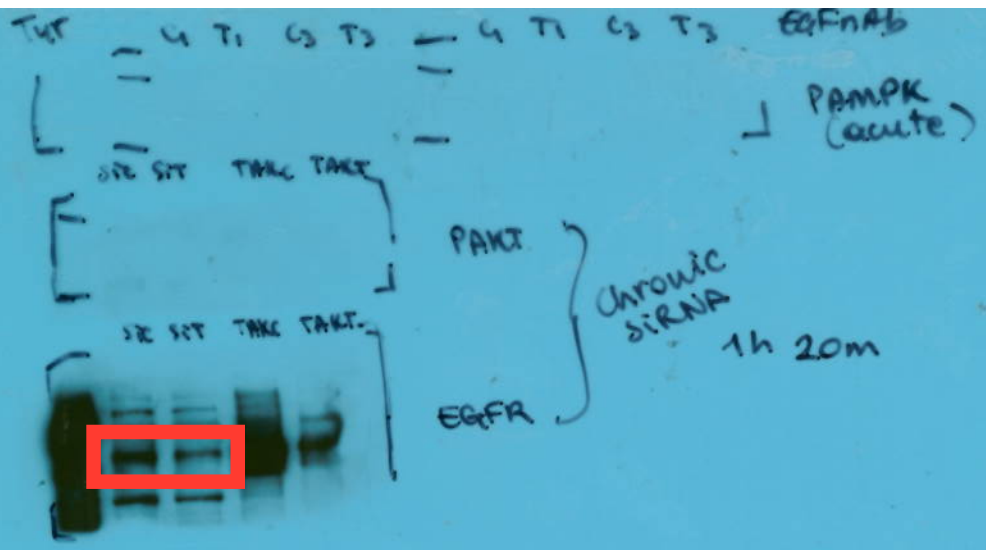

1h 10m

SP SIT TAKC TACT

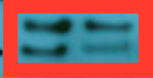

PERK



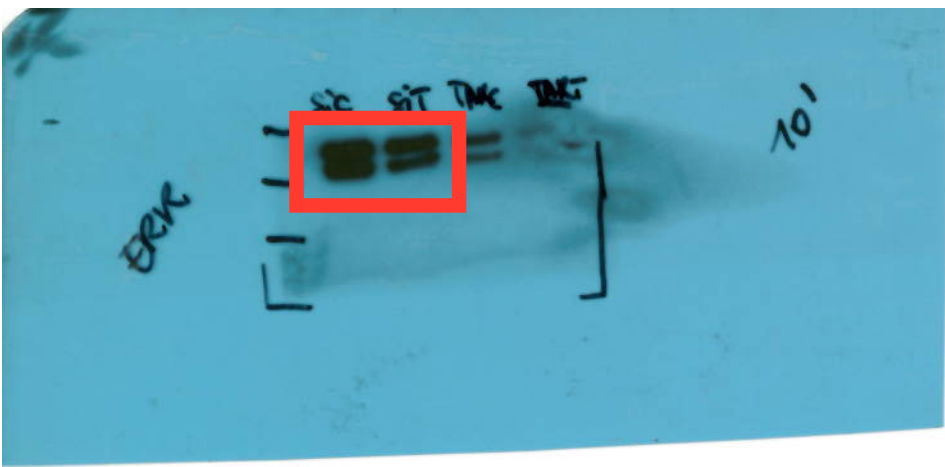

1h30min

ⓅAKT

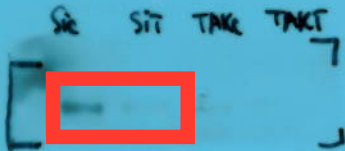

Chronic  
siRNA  
1!

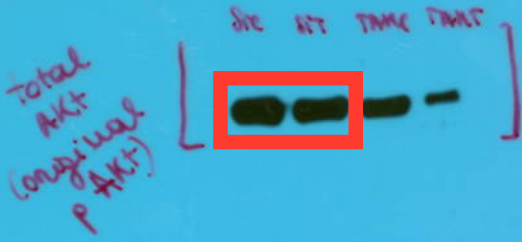

*α-tubulin*

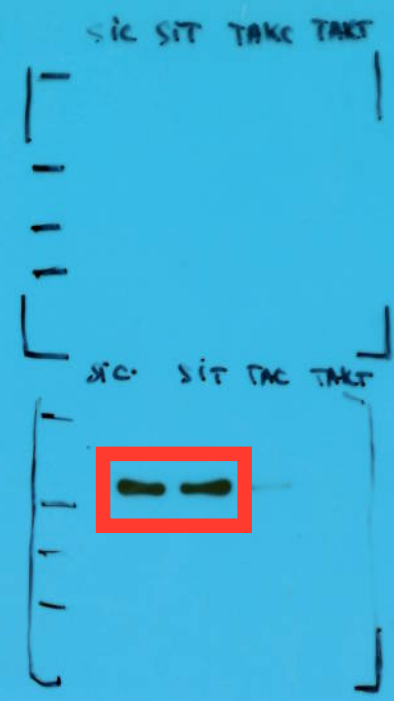

siRNA  
control 2'  
MEM 1  
(PAK1, ERK)  
MEM 2  
(PAK1, ERK)

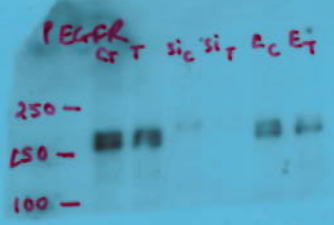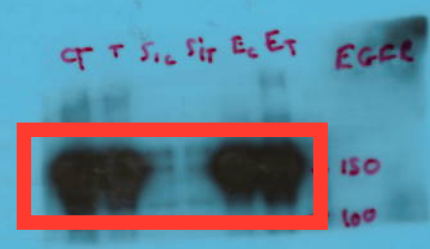

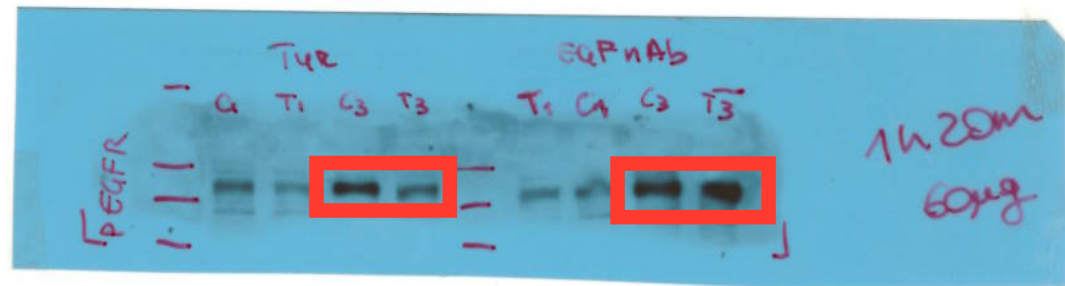

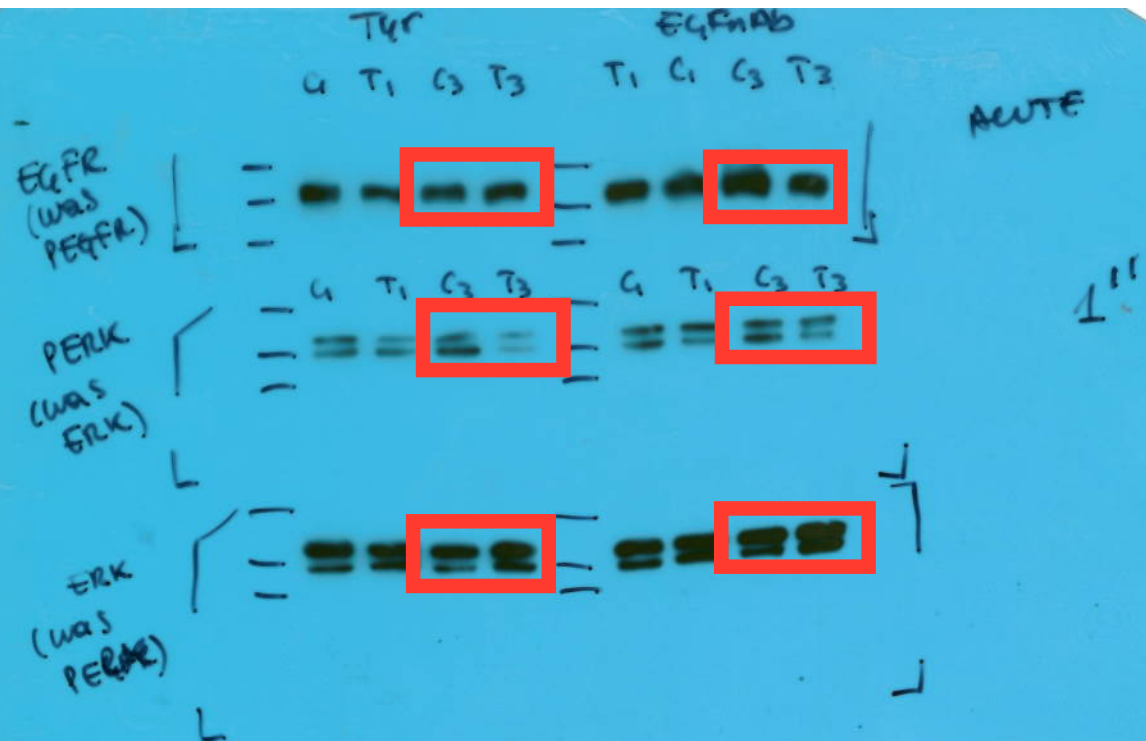

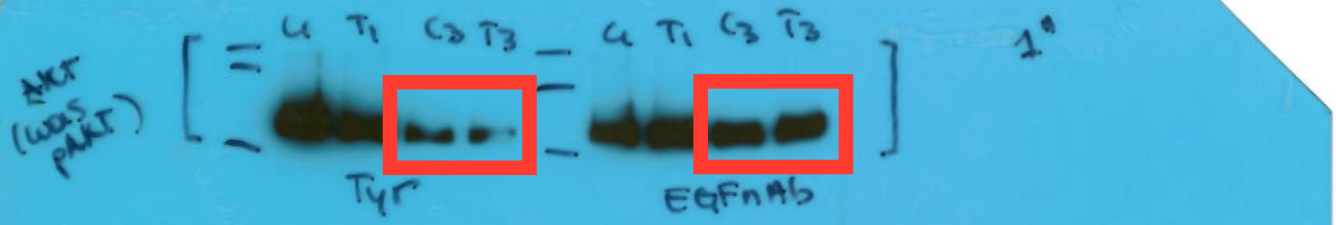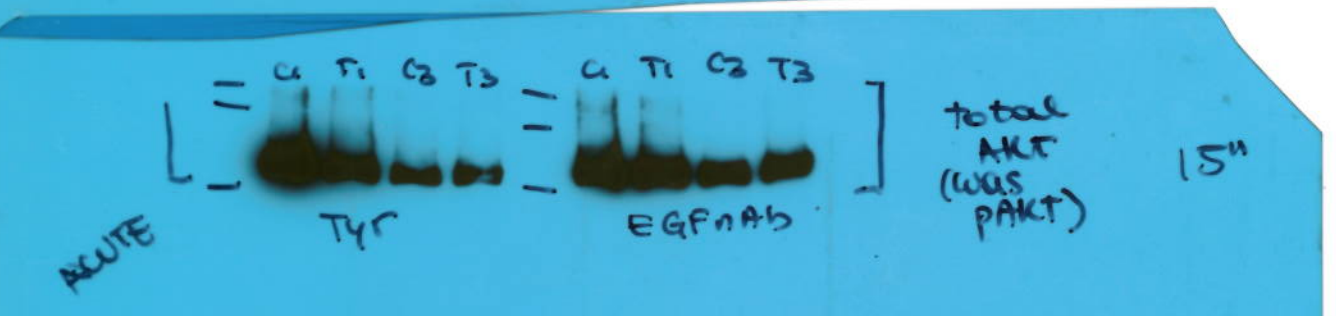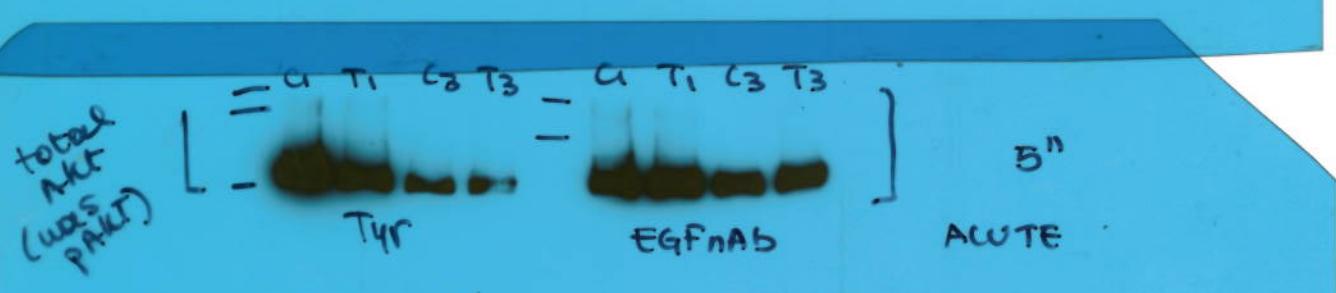





EGFR  
CT T S<sub>1c</sub> S<sub>1T</sub> B<sub>c</sub> E<sub>T</sub>

250 -  
150 -  
100 -

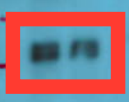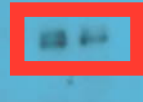

CT T S<sub>1c</sub> S<sub>1T</sub> B<sub>c</sub> E<sub>T</sub> EGFR

- 150  
- 100

Gel # 101 ECL  
1 hr 10 exposure

EMFR

Co T Sic Srr Eo Er

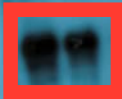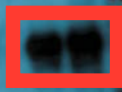

250  
150  
100



Gel 1  
ERK 10 sec exp

C1 T S1c S1r E2 E1

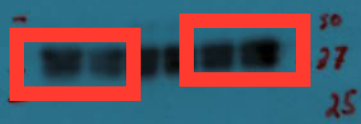

45 min

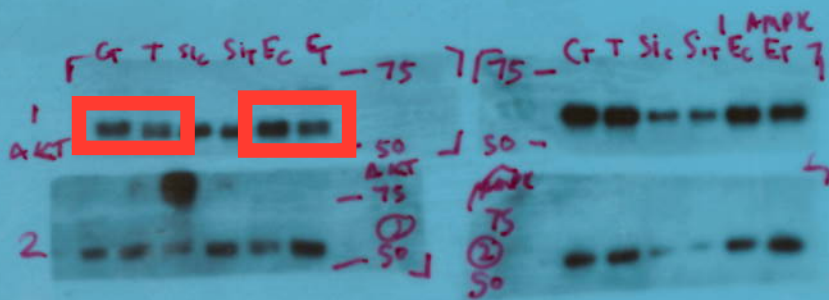

$\alpha$ -tubulin

mem 2

Te Tp Nic Nit Ee Et      To Tr Nc Nt Ec Et

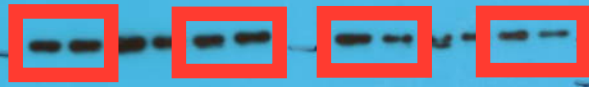

2'

mem 2

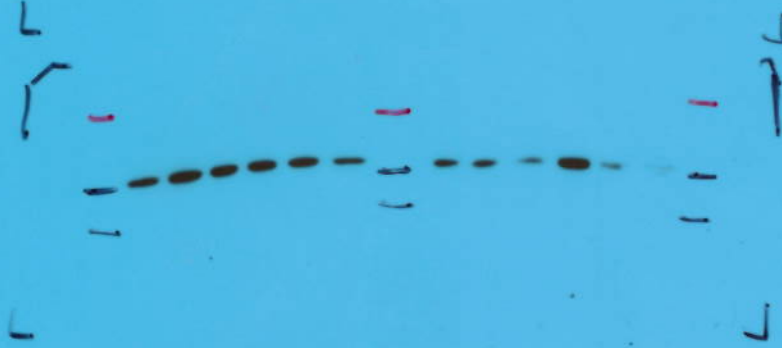

Supplement: 41598_2019_45567_MOESM2_ESM.pdf [file 41598_2019_45567_MOESM2_ESM.pdf]
